# Supplementary material
Source: Research Square preprint supplement (doi:10.21203/rs.3.rs-9373183/v1)
Supplement: Supplementary file 1 [file 490d95db41989c08b65c93de.docx]

**Consequential Outcomes Survey.**

Answer the following questions with a number:

| What is your height in inches? |
| --- |
| What is your weight in pounds? |
| What is your annual income? |
| How many times have you been divorced? |
| How many speeding tickets have you received in the last five years? |
| How many times have you been arrested since age 18? |
| On average, how many alcoholic drinks do you consume per weekday? |
| On average, how many alcoholic drinks do you consume per weekend? |

For each of the following types of behavior, indicate how many times you have participated in it during the past year:

|  | **0 times** | **Once** | **2-5 times** | **6-10 times** | **More than 10 times** |
| --- | --- | --- | --- | --- | --- |
| Driven while under the influence of alcohol. |  |  |  |  |  |
| Used marijuana. |  |  |  |  |  |
| Used cocaine. |  |  |  |  |  |
| Driven more than 20 miles per hour over the speed limit. |  |  |  |  |  |
| Used illegal drugs other than marijuana or cocaine. |  |  |  |  |  |

Answer the following questions on a scale of (1) Strongly Disagree to (5) Strongly Agree:

|  | (1) Strongly Disagree | (2) Disagree | (3)  Neither Agree nor Disagree | (4) Agree | (5) Strongly Agree |
| --- | --- | --- | --- | --- | --- |
| I did not do well academically |  |  |  |  |  |
| I have significant financial debt |  |  |  |  |  |
| People do not tend to agree with me |  |  |  |  |  |
| I have a lot of ideas but I still miss deadlines |  |  |  |  |  |
| I get taken advantage of by family and/or friends |  |  |  |  |  |
| I engage in activities that others find to be risky |  |  |  |  |  |
| I spend less time than my friends participating in leisure activities |  |  |  |  |  |
| I play favorites |  |  |  |  |  |
| I do not apply for job promotions |  |  |  |  |  |
| Others do not take me seriously |  |  |  |  |  |
| I do not have many interests |  |  |  |  |  |
| I brag a lot |  |  |  |  |  |
| I never tell people about my accomplishments |  |  |  |  |  |
| I often hold grudges |  |  |  |  |  |
| I do not often laugh at others' jokes |  |  |  |  |  |

Answer the following questions on a scale from (0) not at all to (4) extremely

|  | 0 = not at all | 1 = somewhat | 2 = moderately | 3 = very | 4 = extremely |
| --- | --- | --- | --- | --- | --- |
| I try to control other people too much |  |  |  |  |  |
| I am too aggressive toward other people |  |  |  |  |  |

Answer the following question on a scale from (1) very little like me to (6) almost always like me

|  | 1 – very little like me | 2 – somewhat like me | 3 – moderately like me | 4 – quite a bit like me | 5 – very like me | 6 – almost always like me |
| --- | --- | --- | --- | --- | --- | --- |
| I can make people laugh |  |  |  |  |  |  |

**Table S1**

*Correlations with Outcomes.*

|  |  | *r* | | |  | *pr* | |
| --- | --- | --- | --- | --- | --- | --- | --- |
| Outcome | Strength | VIA-IS | GMI 1-5 | Optimal |  | GMI 1-5 | Optimal |
| BMI | **Beauty** | -0.10 | -0.01 | 0.01 |  | -0.01 | 0.01 |
|  | Bravery | 0.00 | 0.02 | -0.10 |  | 0.03 | -0.09 |
|  | Creativity | -0.02 | -0.07 | -0.06 |  | -0.06 | -0.06 |
|  | Curiosity | -0.08 | 0.01 | -0.10 |  | 0.03 | -0.11 |
|  | Fairness | -0.03 | -0.08 | 0.01 |  | -0.08 | 0.01 |
|  | Forgiveness | -0.01 | -0.09 | -0.05 |  | -0.08 | -0.04 |
|  | Gratitude | -0.06 | -0.05 | -0.01 |  | -0.04 | -0.01 |
|  | Honesty | -0.04 | -0.05 | 0.01 |  | -0.06 | -0.01 |
|  | Hope | -0.10 | -0.09 | -0.06 |  | -0.05 | -0.05 |
|  | Humility | -0.06 | -0.02 | -0.02 |  | -0.02 | -0.03 |
|  | Humor | 0.04 | -0.06 | -0.02 |  | -0.05 | -0.02 |
|  | **Judgment** | 0.07 | -0.04 | 0.02 |  | -0.04 | 0.03 |
|  | Kindness | 0.05 | -0.09 | 0.00 |  | -0.08 | -0.01 |
|  | Leadership | 0.07 | 0.01 | 0.04 |  | -0.01 | 0.05 |
|  | Love | 0.02 | -0.07 | 0.03 |  | -0.08 | 0.05 |
|  | Learning | 0.03 | -0.07 | 0.03 |  | -0.07 | 0.02 |
|  | **Perseverance** | -0.11 | -0.02 | -0.06 |  | -0.01 | -0.07 |
|  | Perspective | 0.03 | -0.03 | -0.04 |  | -0.03 | -0.04 |
|  | **Prudence** | -0.05 | -0.06 | 0.03 |  | -0.05 | 0.03 |
|  | **Self-Regulation** | -0.14 | -0.06 | -0.08 |  | -0.04 | -0.04 |
|  | Social int | 0.01 | -0.01 | -0.04 |  | -0.01 | 0.00 |
|  | Spirituality | -0.04 | -0.03 | 0.01 |  | -0.03 | -0.08 |
|  | Teamwork | -0.02 | -0.04 | -0.01 |  | -0.04 | -0.01 |
|  | Zest | -0.17 | -0.08 | -0.12 |  | -0.06 | -0.10 |
| Income | Beauty | -0.05 | -0.11 | -0.08 |  | -0.10 | -0.06 |
|  | Bravery | -0.08 | -0.11 | -0.07 |  | -0.10 | -0.06 |
|  | Creativity | -0.06 | -0.04 | -0.07 |  | -0.03 | -0.07 |
|  | Curiosity | -0.09 | -0.07 | -0.09 |  | -0.05 | -0.08 |
|  | Fairness | -0.03 | -0.09 | -0.04 |  | -0.08 | -0.03 |
|  | Forgiveness | 0.03 | -0.01 | -0.05 |  | 0.01 | -0.05 |
|  | Gratitude | -0.09 | 0.01 | -0.08 |  | 0.03 | -0.08 |
|  | Honesty | -0.09 | -0.11 | -0.03 |  | -0.09 | -0.02 |
|  | Hope | -0.09 | -0.03 | -0.07 |  | 0.00 | -0.06 |
|  | Humility | 0.05 | -0.01 | -0.01 |  | 0.00 | -0.01 |
|  | Humor | -0.03 | -0.02 | -0.04 |  | -0.01 | -0.03 |
|  | Judgment | -0.03 | -0.07 | -0.04 |  | -0.07 | -0.02 |
|  | Kindness | -0.01 | -0.05 | -0.07 |  | -0.04 | -0.07 |
|  | Leadership | -0.15 | -0.10 | -0.19 |  | -0.06 | -0.17 |
|  | Love | -0.05 | -0.13 | -0.07 |  | -0.10 | -0.03 |
|  | Learning | -0.08 | -0.07 | -0.05 |  | -0.07 | -0.05 |
|  | **Perseverance** | -0.04 | -0.01 | -0.12 |  | 0.01 | -0.12 |
|  | Perspective | -0.08 | -0.05 | -0.10 |  | -0.04 | -0.10 |
|  | Prudence | 0.02 | -0.06 | -0.09 |  | -0.05 | -0.08 |
|  | **Self-Regulation** | -0.01 | -0.09 | -0.07 |  | -0.06 | -0.10 |
|  | Social int | -0.03 | 0.01 | -0.12 |  | 0.02 | -0.02 |
|  | Spirituality | 0.04 | -0.02 | -0.02 |  | -0.01 | -0.07 |
|  | Teamwork | -0.06 | -0.08 | -0.15 |  | -0.04 | -0.14 |
|  | Zest | -0.12 | -0.01 | -0.10 |  | 0.01 | -0.09 |
| Divorce | Beauty | -0.01 | 0.10 | 0.02 |  | 0.10 | 0.00 |
|  | Bravery | 0.01 | 0.05 | 0.03 |  | 0.04 | 0.04 |
|  | Creativity | -0.01 | 0.01 | 0.09 |  | 0.01 | 0.09 |
|  | Curiosity | -0.07 | 0.06 | 0.04 |  | 0.05 | 0.02 |
|  | Fairness | 0.00 | 0.04 | 0.09 |  | 0.02 | 0.09 |
|  | **Forgiveness** | 0.05 | 0.08 | 0.06 |  | 0.07 | 0.03 |
|  | Gratitude | -0.02 | 0.09 | 0.04 |  | 0.08 | 0.02 |
|  | Honesty | 0.03 | 0.06 | 0.10 |  | 0.04 | 0.09 |
|  | Hope | 0.00 | 0.06 | 0.06 |  | 0.05 | 0.03 |
|  | Humility | -0.03 | 0.05 | 0.12 |  | 0.07 | 0.11 |
|  | Humor | -0.05 | 0.07 | 0.04 |  | 0.05 | 0.03 |
|  | **Judgment** | -0.05 | 0.06 | 0.12 |  | 0.04 | 0.10 |
|  | Kindness | -0.05 | 0.06 | 0.20 |  | 0.05 | 0.19 |
|  | Leadership | -0.03 | 0.04 | 0.01 |  | 0.09 | -0.01 |
|  | **Love** | 0.00 | 0.05 | 0.01 |  | 0.03 | -0.01 |
|  | Learning | 0.00 | 0.03 | 0.07 |  | 0.02 | 0.06 |
|  | Perseverance | -0.09 | 0.06 | 0.02 |  | 0.06 | 0.00 |
|  | Perspective | -0.11 | 0.11 | 0.05 |  | 0.11 | 0.05 |
|  | Prudence | -0.10 | 0.09 | 0.05 |  | 0.08 | 0.03 |
|  | Self-Regulation | -0.05 | 0.01 | 0.02 |  | 0.01 | 0.12 |
|  | Social int | 0.03 | 0.04 | 0.13 |  | 0.07 | 0.11 |
|  | Spirituality | 0.00 | 0.07 | 0.12 |  | 0.07 | 0.01 |
|  | Teamwork | -0.04 | -0.01 | 0.02 |  | 0.03 | 0.01 |
|  | Zest | -0.06 | 0.05 | -0.02 |  | 0.07 | -0.03 |
| Speeding | Beauty | -0.04 | -0.01 | -0.01 |  | 0.00 | -0.01 |
|  | **Bravery** | 0.02 | -0.05 | 0.04 |  | -0.05 | 0.04 |
|  | Creativity | -0.05 | 0.01 | 0.05 |  | 0.01 | 0.05 |
|  | Curiosity | 0.02 | 0.04 | -0.02 |  | 0.04 | -0.03 |
|  | Fairness | -0.04 | -0.02 | -0.06 |  | -0.01 | -0.07 |
|  | Forgiveness | -0.02 | -0.02 | -0.02 |  | -0.01 | -0.02 |
|  | Gratitude | 0.00 | 0.02 | 0.02 |  | 0.01 | 0.01 |
|  | Honesty | 0.06 | -0.03 | -0.01 |  | -0.04 | 0.00 |
|  | Hope | 0.02 | -0.03 | 0.01 |  | -0.04 | 0.02 |
|  | Humility | -0.05 | 0.05 | -0.04 |  | 0.05 | -0.05 |
|  | Humor | 0.01 | -0.02 | 0.01 |  | -0.03 | 0.02 |
|  | **Judgment** | -0.03 | -0.07 | 0.01 |  | -0.07 | 0.02 |
|  | Kindness | 0.03 | 0.03 | -0.04 |  | 0.03 | -0.05 |
|  | Leadership | 0.02 | 0.04 | 0.07 |  | 0.03 | 0.06 |
|  | Love | -0.02 | -0.01 | 0.02 |  | -0.02 | 0.02 |
|  | Learning | -0.01 | 0.02 | -0.08 |  | 0.02 | -0.09 |
|  | Perseverance | 0.04 | 0.01 | 0.05 |  | 0.00 | 0.05 |
|  | Perspective | -0.01 | 0.07 | 0.07 |  | 0.06 | 0.07 |
|  | Prudence | -0.05 | 0.04 | 0.04 |  | 0.03 | 0.03 |
|  | Self-Regulation | 0.03 | 0.03 | -0.02 |  | 0.03 | -0.03 |
|  | Social int | -0.01 | -0.02 | -0.03 |  | -0.02 | -0.01 |
|  | Spirituality | 0.02 | 0.00 | -0.01 |  | 0.01 | -0.03 |
|  | Teamwork | 0.00 | 0.02 | 0.05 |  | 0.01 | 0.04 |
|  | **Zest** | 0.06 | -0.02 | 0.08 |  | -0.04 | 0.08 |
| Arrests | Beauty | -0.10 | 0.03 | -0.02 |  | 0.03 | -0.01 |
|  | **Bravery** | 0.00 | -0.02 | -0.03 |  | -0.02 | -0.03 |
|  | Creativity | -0.04 | -0.08 | 0.02 |  | -0.09 | 0.03 |
|  | Curiosity | -0.15 | -0.01 | -0.02 |  | 0.00 | -0.05 |
|  | Fairness | -0.15 | 0.00 | 0.01 |  | -0.01 | 0.02 |
|  | Forgiveness | -0.14 | 0.00 | -0.08 |  | 0.03 | -0.09 |
|  | Gratitude | -0.05 | 0.03 | 0.01 |  | 0.03 | 0.01 |
|  | Honesty | -0.08 | 0.00 | -0.03 |  | 0.00 | -0.02 |
|  | Hope | -0.09 | -0.04 | 0.00 |  | -0.04 | 0.01 |
|  | Humility | -0.16 | -0.08 | -0.01 |  | 0.00 | -0.01 |
|  | Humor | -0.06 | -0.05 | 0.00 |  | -0.05 | 0.01 |
|  | **Judgment** | -0.16 | -0.02 | -0.02 |  | -0.02 | -0.05 |
|  | Kindness | -0.18 | 0.00 | -0.04 |  | 0.01 | -0.04 |
|  | Leadership | -0.06 | -0.10 | -0.03 |  | -0.02 | -0.02 |
|  | Love | -0.07 | -0.05 | -0.05 |  | -0.04 | -0.03 |
|  | Learning | -0.15 | 0.03 | 0.02 |  | 0.03 | 0.00 |
|  | Perseverance | -0.09 | -0.04 | -0.02 |  | -0.03 | -0.01 |
|  | Perspective | -0.11 | 0.01 | 0.01 |  | 0.01 | 0.01 |
|  | Prudence | -0.17 | -0.04 | -0.06 |  | -0.03 | -0.05 |
|  | **Self-Regulation** | -0.08 | -0.09 | -0.10 |  | -0.02 | -0.01 |
|  | Social int | -0.08 | -0.04 | -0.02 |  | 0.03 | 0.05 |
|  | Spirituality | -0.04 | 0.00 | 0.06 |  | 0.01 | -0.10 |
|  | Teamwork | -0.10 | -0.07 | 0.03 |  | 0.00 | 0.04 |
|  | Zest | -0.06 | -0.02 | -0.01 |  | -0.02 | -0.01 |
| Drinks Weekday | Beauty | -0.07 | 0.04 | -0.04 |  | 0.05 | -0.05 |
|  | Bravery | -0.10 | -0.01 | -0.05 |  | -0.01 | -0.04 |
|  | Creativity | -0.05 | -0.09 | 0.04 |  | -0.09 | 0.04 |
|  | Curiosity | -0.09 | 0.02 | 0.00 |  | 0.02 | -0.03 |
|  | Fairness | -0.18 | 0.04 | -0.08 |  | 0.05 | -0.08 |
|  | **Forgiveness** | -0.13 | -0.02 | 0.00 |  | -0.02 | 0.01 |
|  | Gratitude | -0.09 | 0.00 | 0.04 |  | -0.01 | 0.05 |
|  | Honesty | -0.13 | -0.05 | -0.06 |  | -0.03 | -0.05 |
|  | Hope | -0.12 | -0.02 | -0.03 |  | -0.01 | -0.04 |
|  | Humility | -0.13 | -0.03 | -0.05 |  | 0.04 | -0.07 |
|  | Humor | -0.01 | -0.03 | 0.05 |  | -0.05 | 0.05 |
|  | Judgment | -0.14 | -0.04 | 0.03 |  | -0.04 | 0.01 |
|  | Kindness | -0.17 | 0.03 | -0.01 |  | 0.03 | -0.03 |
|  | Leadership | -0.06 | -0.06 | 0.02 |  | 0.02 | 0.02 |
|  | Love | -0.07 | 0.05 | -0.01 |  | 0.06 | -0.04 |
|  | Learning | -0.12 | 0.01 | 0.02 |  | 0.00 | 0.00 |
|  | Perseverance | -0.09 | 0.02 | 0.00 |  | 0.02 | -0.01 |
|  | Perspective | -0.11 | 0.03 | -0.05 |  | 0.04 | -0.03 |
|  | Prudence | -0.12 | 0.00 | 0.03 |  | 0.00 | 0.03 |
|  | **Self-Regulation** | -0.09 | -0.07 | -0.01 |  | -0.02 | 0.01 |
|  | **Social int** | -0.12 | -0.05 | 0.00 |  | 0.01 | 0.00 |
|  | Spirituality | -0.09 | -0.02 | 0.02 |  | -0.02 | -0.02 |
|  | Teamwork | -0.08 | -0.11 | 0.00 |  | -0.05 | 0.01 |
|  | Zest | -0.05 | 0.00 | -0.02 |  | 0.00 | -0.02 |
| Drinks Weekend | Beauty | -0.09 | 0.05 | 0.01 |  | 0.05 | 0.00 |
|  | Bravery | -0.08 | 0.06 | -0.04 |  | 0.06 | -0.05 |
|  | Creativity | -0.09 | -0.10 | -0.04 |  | -0.10 | -0.04 |
|  | Curiosity | -0.14 | 0.06 | -0.02 |  | 0.07 | -0.08 |
|  | Fairness | -0.16 | 0.06 | -0.08 |  | 0.07 | -0.08 |
|  | Forgiveness | -0.15 | -0.03 | -0.05 |  | -0.03 | -0.02 |
|  | Gratitude | -0.11 | 0.00 | -0.01 |  | -0.01 | 0.01 |
|  | Honesty | -0.15 | 0.00 | -0.11 |  | 0.01 | -0.11 |
|  | Hope | -0.13 | 0.01 | -0.05 |  | 0.02 | -0.06 |
|  | Humility | -0.20 | -0.09 | -0.03 |  | -0.01 | -0.02 |
|  | Humor | 0.03 | 0.03 | 0.04 |  | 0.02 | 0.02 |
|  | **Judgment** | -0.20 | 0.00 | -0.02 |  | 0.02 | -0.07 |
|  | Kindness | -0.15 | 0.04 | -0.06 |  | 0.04 | -0.08 |
|  | Leadership | -0.05 | -0.07 | 0.00 |  | 0.04 | -0.02 |
|  | Love | -0.02 | 0.06 | 0.03 |  | 0.04 | 0.03 |
|  | Learning | -0.19 | 0.04 | -0.04 |  | 0.04 | -0.09 |
|  | Perseverance | -0.10 | 0.00 | 0.00 |  | 0.01 | -0.02 |
|  | Perspective | -0.09 | -0.01 | -0.01 |  | -0.01 | -0.02 |
|  | **Prudence** | -0.17 | -0.04 | -0.02 |  | -0.03 | -0.01 |
|  | **Self-Regulation** | -0.13 | -0.11 | -0.07 |  | -0.04 | -0.03 |
|  | **Social int** | -0.08 | -0.04 | -0.04 |  | 0.06 | -0.09 |
|  | Spirituality | -0.16 | -0.03 | -0.06 |  | -0.02 | -0.07 |
|  | Teamwork | -0.13 | -0.14 | -0.02 |  | -0.07 | 0.00 |
|  | **Zest** | -0.03 | 0.00 | 0.01 |  | 0.00 | 0.01 |
| DWI | Beauty | -0.09 | 0.00 | -0.14 |  | 0.02 | -0.15 |
|  | **Bravery** | -0.02 | -0.09 | -0.03 |  | -0.10 | -0.02 |
|  | Creativity | 0.03 | -0.11 | -0.01 |  | -0.11 | -0.01 |
|  | Curiosity | -0.07 | -0.05 | -0.09 |  | -0.04 | -0.09 |
|  | Fairness | -0.19 | -0.06 | -0.13 |  | -0.05 | -0.12 |
|  | Forgiveness | -0.15 | -0.10 | -0.09 |  | -0.09 | -0.06 |
|  | Gratitude | -0.15 | -0.09 | -0.09 |  | -0.09 | -0.06 |
|  | Honesty | -0.18 | -0.05 | -0.15 |  | -0.01 | -0.13 |
|  | Hope | -0.08 | -0.11 | -0.09 |  | -0.09 | -0.06 |
|  | Humility | -0.13 | -0.11 | -0.10 |  | -0.08 | -0.09 |
|  | Humor | 0.10 | -0.08 | -0.02 |  | -0.09 | 0.01 |
|  | **Judgment** | -0.14 | -0.10 | -0.07 |  | -0.08 | -0.06 |
|  | Kindness | -0.11 | 0.02 | -0.15 |  | 0.03 | -0.15 |
|  | Leadership | 0.01 | -0.12 | 0.00 |  | -0.09 | 0.02 |
|  | Love | -0.09 | -0.06 | -0.08 |  | -0.02 | -0.07 |
|  | Learning | -0.10 | -0.05 | -0.08 |  | -0.04 | -0.10 |
|  | Perseverance | -0.10 | -0.12 | -0.03 |  | -0.12 | -0.01 |
|  | Perspective | -0.02 | -0.08 | -0.05 |  | -0.07 | -0.05 |
|  | **Prudence** | -0.21 | -0.08 | -0.10 |  | -0.07 | -0.09 |
|  | **Self-Regulation** | -0.12 | -0.15 | -0.14 |  | -0.11 | -0.08 |
|  | Social int | -0.03 | -0.11 | -0.11 |  | -0.09 | -0.01 |
|  | Spirituality | -0.08 | -0.04 | -0.02 |  | -0.03 | -0.14 |
|  | Teamwork | -0.09 | -0.07 | -0.03 |  | -0.04 | -0.02 |
|  | Zest | 0.00 | -0.02 | -0.06 |  | 0.00 | -0.07 |
| Marijuana | Beauty | 0.04 | -0.03 | -0.01 |  | -0.03 | -0.01 |
|  | Bravery | 0.00 | -0.06 | -0.08 |  | -0.06 | -0.08 |
|  | **Creativity** | 0.08 | -0.06 | 0.01 |  | -0.07 | 0.02 |
|  | **Curiosity** | -0.01 | -0.08 | -0.12 |  | -0.07 | -0.11 |
|  | Fairness | -0.05 | -0.06 | -0.05 |  | -0.06 | -0.03 |
|  | Forgiveness | -0.06 | -0.04 | -0.08 |  | -0.03 | -0.06 |
|  | Gratitude | -0.08 | -0.06 | -0.04 |  | -0.07 | -0.01 |
|  | Honesty | -0.09 | -0.05 | -0.16 |  | -0.03 | -0.15 |
|  | Hope | -0.10 | -0.10 | -0.10 |  | -0.08 | -0.06 |
|  | Humility | -0.10 | -0.03 | -0.05 |  | -0.01 | -0.04 |
|  | Humor | 0.15 | -0.03 | -0.02 |  | -0.03 | -0.01 |
|  | **Judgment** | 0.00 | -0.09 | -0.09 |  | -0.07 | -0.08 |
|  | Kindness | -0.01 | 0.02 | -0.15 |  | 0.03 | -0.14 |
|  | Leadership | -0.07 | -0.05 | -0.11 |  | -0.01 | -0.10 |
|  | Love | 0.02 | -0.08 | -0.06 |  | -0.08 | -0.03 |
|  | Learning | -0.12 | -0.04 | -0.11 |  | -0.04 | -0.12 |
|  | Perseverance | -0.15 | -0.04 | -0.04 |  | -0.04 | -0.02 |
|  | Perspective | 0.02 | -0.09 | -0.01 |  | -0.10 | 0.00 |
|  | Prudence | -0.15 | -0.09 | -0.16 |  | -0.07 | -0.13 |
|  | **Self-Regulation** | -0.17 | -0.12 | -0.17 |  | -0.09 | -0.14 |
|  | Social int | 0.06 | -0.09 | -0.16 |  | -0.07 | -0.04 |
|  | Spirituality | -0.13 | -0.08 | -0.04 |  | -0.07 | -0.14 |
|  | Teamwork | -0.13 | -0.12 | -0.12 |  | -0.09 | -0.10 |
|  | Zest | -0.06 | -0.04 | -0.14 |  | -0.01 | -0.14 |
| Cocaine | Beauty | -0.02 | -0.04 | -0.04 |  | -0.03 | -0.04 |
|  | Bravery | 0.01 | -0.10 | -0.12 |  | -0.09 | -0.11 |
|  | Creativity | -0.01 | -0.11 | -0.04 |  | -0.11 | -0.03 |
|  | **Curiosity** | -0.05 | -0.06 | -0.08 |  | -0.05 | -0.08 |
|  | Fairness | -0.11 | -0.15 | -0.08 |  | -0.14 | -0.06 |
|  | Forgiveness | -0.05 | -0.08 | -0.13 |  | -0.04 | -0.11 |
|  | Gratitude | -0.04 | -0.08 | -0.07 |  | -0.07 | -0.06 |
|  | Honesty | -0.09 | -0.10 | -0.12 |  | -0.07 | -0.12 |
|  | Hope | -0.02 | -0.12 | -0.06 |  | -0.11 | -0.03 |
|  | Humility | -0.11 | -0.06 | -0.11 |  | -0.01 | -0.11 |
|  | Humor | 0.00 | -0.04 | 0.00 |  | -0.04 | 0.00 |
|  | **Judgment** | -0.13 | -0.10 | -0.15 |  | -0.06 | -0.15 |
|  | Kindness | 0.01 | -0.03 | -0.09 |  | -0.03 | -0.08 |
|  | Leadership | -0.09 | -0.10 | -0.06 |  | -0.05 | -0.05 |
|  | Love | 0.02 | -0.09 | -0.06 |  | -0.06 | -0.04 |
|  | Learning | -0.08 | -0.06 | -0.11 |  | -0.05 | -0.12 |
|  | Perseverance | -0.08 | -0.09 | -0.09 |  | -0.07 | -0.07 |
|  | Perspective | -0.03 | -0.07 | 0.00 |  | -0.07 | 0.01 |
|  | Prudence | -0.18 | -0.11 | -0.15 |  | -0.09 | -0.14 |
|  | **Self-Regulation** | -0.11 | -0.18 | -0.18 |  | -0.13 | -0.09 |
|  | Social int | 0.01 | -0.11 | -0.12 |  | -0.09 | -0.02 |
|  | Spirituality | -0.05 | -0.08 | -0.03 |  | -0.06 | -0.18 |
|  | Teamwork | -0.11 | -0.08 | -0.04 |  | -0.04 | -0.04 |
|  | **Zest** | 0.04 | -0.05 | -0.09 |  | -0.03 | -0.08 |
| 20mph | Beauty | -0.08 | 0.02 | -0.05 |  | 0.02 | -0.06 |
|  | **Bravery** | -0.02 | 0.02 | -0.10 |  | 0.02 | -0.09 |
|  | Creativity | -0.02 | -0.01 | -0.01 |  | -0.02 | -0.01 |
|  | Curiosity | -0.04 | 0.01 | -0.14 |  | 0.03 | -0.14 |
|  | Fairness | -0.06 | -0.01 | -0.05 |  | -0.01 | -0.05 |
|  | Forgiveness | -0.04 | -0.05 | -0.04 |  | -0.05 | -0.04 |
|  | Gratitude | -0.05 | 0.02 | 0.01 |  | 0.01 | 0.00 |
|  | Honesty | -0.09 | -0.02 | -0.08 |  | -0.01 | -0.08 |
|  | Hope | -0.08 | -0.06 | -0.04 |  | -0.04 | -0.03 |
|  | Humility | -0.12 | 0.02 | -0.07 |  | 0.03 | -0.08 |
|  | Humor | 0.13 | -0.07 | 0.02 |  | -0.09 | 0.04 |
|  | **Judgment** | -0.13 | -0.05 | -0.11 |  | -0.03 | -0.11 |
|  | Kindness | -0.02 | 0.02 | -0.09 |  | 0.03 | -0.10 |
|  | Leadership | 0.07 | -0.01 | 0.05 |  | -0.01 | 0.04 |
|  | Love | 0.03 | 0.00 | -0.02 |  | 0.00 | -0.03 |
|  | Learning | -0.13 | -0.01 | -0.11 |  | -0.01 | -0.11 |
|  | Perseverance | -0.15 | -0.02 | -0.08 |  | -0.01 | -0.08 |
|  | Perspective | 0.04 | -0.07 | -0.02 |  | -0.08 | -0.01 |
|  | Prudence | -0.14 | 0.00 | -0.14 |  | 0.01 | -0.14 |
|  | **Self-Regulation** | -0.13 | -0.03 | -0.08 |  | -0.02 | -0.04 |
|  | Social int | 0.05 | -0.03 | -0.05 |  | -0.02 | 0.00 |
|  | Spirituality | -0.10 | -0.07 | 0.00 |  | -0.07 | -0.08 |
|  | Teamwork | -0.06 | -0.04 | -0.02 |  | -0.03 | -0.02 |
|  | Zest | -0.03 | -0.04 | -0.09 |  | -0.03 | -0.09 |
| Illicit Drugs | Beauty | -0.08 | -0.03 | -0.08 |  | -0.02 | -0.05 |
|  | Bravery | 0.01 | -0.13 | -0.06 |  | -0.13 | -0.04 |
|  | Creativity | 0.01 | -0.05 | -0.04 |  | -0.05 | -0.03 |
|  | **Curiosity** | -0.10 | -0.06 | -0.12 |  | -0.04 | -0.11 |
|  | Fairness | -0.08 | -0.08 | -0.07 |  | -0.08 | -0.03 |
|  | Forgiveness | -0.03 | -0.10 | -0.09 |  | -0.08 | -0.06 |
|  | Gratitude | -0.09 | -0.04 | -0.02 |  | -0.04 | -0.01 |
|  | Honesty | -0.08 | -0.06 | -0.10 |  | -0.03 | -0.09 |
|  | Hope | -0.11 | -0.10 | -0.09 |  | -0.08 | -0.05 |
|  | Humility | -0.08 | -0.09 | -0.02 |  | -0.08 | -0.01 |
|  | Humor | 0.03 | -0.03 | -0.03 |  | -0.03 | -0.01 |
|  | **Judgment** | -0.12 | -0.08 | -0.12 |  | -0.05 | -0.11 |
|  | Kindness | -0.05 | -0.02 | -0.09 |  | -0.02 | -0.09 |
|  | Leadership | -0.11 | -0.05 | -0.12 |  | 0.00 | -0.11 |
|  | Love | -0.01 | -0.10 | -0.11 |  | -0.07 | -0.07 |
|  | Learning | -0.17 | -0.03 | -0.10 |  | -0.03 | -0.09 |
|  | Perseverance | -0.08 | -0.06 | -0.08 |  | -0.05 | -0.08 |
|  | Perspective | 0.02 | -0.05 | -0.03 |  | -0.05 | -0.02 |
|  | Prudence | -0.20 | -0.09 | -0.13 |  | -0.08 | -0.11 |
|  | **Self-Regulation** | -0.19 | -0.13 | -0.17 |  | -0.10 | -0.06 |
|  | Social int | 0.01 | -0.05 | -0.10 |  | -0.04 | 0.02 |
|  | Spirituality | -0.06 | -0.03 | 0.02 |  | -0.02 | -0.14 |
|  | Teamwork | -0.09 | -0.08 | -0.06 |  | -0.05 | -0.03 |
|  | Zest | -0.07 | -0.04 | -0.14 |  | -0.01 | -0.13 |
| Control Things | Beauty | -0.17 | -0.10 | -0.18 |  | -0.08 | -0.15 |
|  | Bravery | 0.04 | -0.11 | -0.10 |  | -0.11 | -0.09 |
|  | Creativity | -0.06 | -0.08 | -0.10 |  | -0.08 | -0.09 |
|  | Curiosity | -0.17 | -0.09 | -0.20 |  | -0.06 | -0.19 |
|  | Fairness | -0.24 | -0.14 | -0.22 |  | -0.12 | -0.19 |
|  | Forgiveness | -0.25 | -0.17 | -0.22 |  | -0.10 | -0.17 |
|  | Gratitude | -0.25 | -0.11 | -0.23 |  | -0.07 | -0.21 |
|  | Honesty | -0.06 | -0.13 | -0.16 |  | -0.11 | -0.14 |
|  | Hope | -0.24 | -0.14 | -0.17 |  | -0.09 | -0.13 |
|  | Humility | -0.24 | -0.14 | -0.17 |  | -0.10 | -0.16 |
|  | Humor | -0.15 | -0.04 | -0.26 |  | 0.01 | -0.25 |
|  | Judgment | -0.05 | -0.21 | -0.21 |  | -0.17 | -0.17 |
|  | Kindness | -0.12 | -0.07 | -0.23 |  | -0.05 | -0.22 |
|  | **Leadership** | -0.08 | -0.07 | -0.05 |  | -0.04 | -0.03 |
|  | Love | -0.16 | -0.11 | -0.21 |  | -0.03 | -0.18 |
|  | Learning | -0.11 | -0.10 | -0.14 |  | -0.08 | -0.14 |
|  | Perseverance | -0.10 | -0.15 | -0.13 |  | -0.12 | -0.11 |
|  | Perspective | -0.11 | -0.11 | -0.13 |  | -0.10 | -0.12 |
|  | Prudence | -0.07 | -0.13 | -0.08 |  | -0.10 | -0.05 |
|  | **Self-Regulation** | -0.13 | -0.12 | -0.28 |  | -0.04 | -0.23 |
|  | Social int | -0.23 | -0.12 | -0.25 |  | -0.09 | -0.11 |
|  | Spirituality | -0.08 | -0.07 | -0.11 |  | -0.04 | -0.26 |
|  | **Teamwork** | -0.14 | -0.10 | -0.16 |  | -0.06 | -0.14 |
|  | Zest | -0.20 | -0.14 | -0.19 |  | -0.11 | -0.16 |
| Bad in School | Beauty | -0.06 | -0.04 | -0.05 |  | -0.04 | -0.04 |
|  | Bravery | -0.04 | -0.13 | -0.16 |  | -0.12 | -0.14 |
|  | Creativity | -0.03 | -0.04 | -0.10 |  | -0.04 | -0.09 |
|  | Curiosity | -0.16 | -0.15 | -0.23 |  | -0.12 | -0.21 |
|  | Fairness | -0.14 | -0.11 | -0.08 |  | -0.10 | -0.06 |
|  | Forgiveness | -0.07 | -0.07 | -0.05 |  | -0.05 | -0.03 |
|  | Gratitude | -0.17 | -0.09 | -0.09 |  | -0.08 | -0.08 |
|  | Honesty | -0.13 | -0.04 | -0.11 |  | -0.02 | -0.10 |
|  | Hope | -0.16 | -0.09 | -0.14 |  | -0.06 | -0.12 |
|  | Humility | -0.02 | -0.05 | -0.09 |  | -0.04 | -0.08 |
|  | Humor | 0.00 | -0.08 | -0.05 |  | -0.08 | -0.03 |
|  | Judgment | -0.07 | -0.06 | -0.08 |  | -0.05 | -0.07 |
|  | Kindness | -0.08 | -0.03 | -0.04 |  | -0.04 | -0.04 |
|  | Leadership | -0.12 | -0.12 | -0.15 |  | -0.10 | -0.11 |
|  | Love | -0.14 | -0.08 | -0.12 |  | -0.02 | -0.12 |
|  | Learning | -0.25 | -0.14 | -0.22 |  | -0.13 | -0.22 |
|  | **Perseverance** | -0.22 | -0.12 | -0.23 |  | -0.07 | -0.21 |
|  | Perspective | -0.18 | -0.04 | -0.08 |  | -0.04 | -0.06 |
|  | Prudence | -0.14 | -0.03 | -0.18 |  | 0.00 | -0.18 |
|  | **Self-Regulation** | -0.21 | -0.12 | -0.12 |  | -0.09 | -0.06 |
|  | Social int | -0.07 | -0.04 | -0.09 |  | -0.03 | -0.10 |
|  | Spirituality | -0.04 | -0.07 | -0.10 |  | -0.05 | -0.11 |
|  | Teamwork | -0.04 | -0.12 | -0.11 |  | -0.11 | -0.08 |
|  | Zest | -0.14 | -0.07 | -0.18 |  | -0.03 | -0.17 |
| Debt | Beauty | -0.05 | -0.04 | -0.04 |  | -0.04 | -0.03 |
|  | Bravery | 0.00 | -0.04 | -0.14 |  | -0.03 | -0.13 |
|  | Creativity | 0.01 | -0.10 | -0.03 |  | -0.09 | -0.02 |
|  | Curiosity | -0.06 | -0.08 | -0.12 |  | -0.06 | -0.12 |
|  | Fairness | -0.06 | -0.04 | -0.08 |  | -0.04 | -0.06 |
|  | Forgiveness | -0.05 | -0.11 | -0.15 |  | -0.09 | -0.11 |
|  | Gratitude | -0.11 | -0.07 | -0.12 |  | -0.06 | -0.11 |
|  | Honesty | -0.19 | -0.08 | -0.12 |  | -0.06 | -0.12 |
|  | Hope | -0.10 | -0.12 | -0.13 |  | -0.08 | -0.10 |
|  | Humility | -0.11 | 0.00 | -0.03 |  | 0.01 | -0.04 |
|  | Humor | 0.12 | -0.02 | -0.03 |  | -0.02 | -0.02 |
|  | **Judgment** | -0.09 | -0.03 | -0.14 |  | 0.00 | -0.14 |
|  | Kindness | -0.01 | -0.08 | -0.08 |  | -0.08 | -0.08 |
|  | Leadership | -0.02 | -0.02 | -0.12 |  | 0.03 | -0.12 |
|  | Love | 0.00 | -0.08 | -0.08 |  | -0.07 | -0.04 |
|  | Learning | -0.03 | -0.05 | -0.05 |  | -0.05 | -0.05 |
|  | Perseverance | -0.20 | -0.08 | -0.16 |  | -0.05 | -0.16 |
|  | **Perspective** | -0.03 | -0.01 | -0.03 |  | -0.01 | -0.02 |
|  | Prudence | -0.12 | -0.07 | -0.18 |  | -0.06 | -0.18 |
|  | **Self-Regulation** | -0.17 | -0.11 | -0.16 |  | -0.10 | -0.05 |
|  | Social int | 0.03 | -0.03 | -0.08 |  | -0.01 | -0.01 |
|  | Spirituality | 0.06 | -0.06 | -0.01 |  | -0.04 | -0.15 |
|  | Teamwork | -0.04 | -0.10 | -0.16 |  | -0.06 | -0.15 |
|  | Zest | -0.11 | -0.04 | -0.20 |  | 0.00 | -0.20 |
| Disagree | Beauty | -0.22 | -0.09 | -0.27 |  | -0.05 | -0.26 |
|  | Bravery | -0.06 | -0.22 | -0.15 |  | -0.22 | -0.12 |
|  | Creativity | -0.13 | -0.10 | -0.27 |  | -0.08 | -0.26 |
|  | Curiosity | -0.23 | -0.12 | -0.24 |  | -0.09 | -0.24 |
|  | Fairness | -0.15 | -0.10 | -0.21 |  | -0.08 | -0.20 |
|  | Forgiveness | -0.19 | -0.16 | -0.22 |  | -0.08 | -0.19 |
|  | Gratitude | -0.26 | -0.11 | -0.25 |  | -0.06 | -0.23 |
|  | Honesty | -0.12 | -0.17 | -0.22 |  | -0.14 | -0.21 |
|  | Hope | -0.26 | -0.18 | -0.28 |  | -0.11 | -0.24 |
|  | Humility | -0.08 | -0.19 | -0.12 |  | -0.16 | -0.12 |
|  | Humor | -0.18 | -0.10 | -0.29 |  | -0.05 | -0.27 |
|  | Judgment | -0.11 | -0.09 | -0.18 |  | -0.05 | -0.18 |
|  | Kindness | -0.19 | -0.10 | -0.16 |  | -0.09 | -0.16 |
|  | Leadership | -0.31 | -0.18 | -0.27 |  | -0.11 | -0.23 |
|  | Love | -0.21 | -0.16 | -0.29 |  | -0.05 | -0.25 |
|  | Learning | -0.17 | -0.08 | -0.16 |  | -0.06 | -0.17 |
|  | Perseverance | -0.13 | -0.14 | -0.23 |  | -0.08 | -0.22 |
|  | **Perspective** | -0.29 | -0.11 | -0.19 |  | -0.10 | -0.18 |
|  | Prudence | -0.12 | -0.19 | -0.11 |  | -0.17 | -0.09 |
|  | Self-Regulation | -0.09 | -0.17 | -0.31 |  | -0.09 | -0.25 |
|  | **Social int** | -0.32 | -0.20 | -0.27 |  | -0.17 | -0.08 |
|  | Spirituality | -0.11 | -0.10 | -0.10 |  | -0.06 | -0.30 |
|  | Teamwork | -0.19 | -0.16 | -0.25 |  | -0.09 | -0.23 |
|  | Zest | -0.30 | -0.12 | -0.26 |  | -0.07 | -0.24 |
| Miss Deadlines | Beauty | -0.06 | -0.15 | -0.13 |  | -0.14 | -0.12 |
|  | Bravery | -0.02 | -0.13 | -0.20 |  | -0.12 | -0.19 |
|  | **Creativity** | 0.10 | -0.13 | -0.15 |  | -0.12 | -0.14 |
|  | Curiosity | 0.00 | -0.20 | -0.30 |  | -0.16 | -0.29 |
|  | Fairness | -0.15 | -0.11 | -0.16 |  | -0.10 | -0.14 |
|  | Forgiveness | -0.03 | -0.21 | -0.19 |  | -0.15 | -0.15 |
|  | Gratitude | -0.20 | -0.14 | -0.09 |  | -0.12 | -0.06 |
|  | Honesty | -0.34 | -0.05 | -0.23 |  | -0.02 | -0.23 |
|  | Hope | -0.25 | -0.20 | -0.24 |  | -0.14 | -0.18 |
|  | Humility | -0.15 | -0.10 | -0.17 |  | -0.07 | -0.15 |
|  | Humor | 0.03 | -0.08 | -0.10 |  | -0.07 | -0.08 |
|  | Judgment | -0.15 | -0.16 | -0.26 |  | -0.10 | -0.24 |
|  | Kindness | -0.04 | -0.14 | -0.20 |  | -0.14 | -0.19 |
|  | Leadership | -0.21 | -0.16 | -0.18 |  | -0.11 | -0.15 |
|  | Love | -0.09 | -0.15 | -0.19 |  | -0.09 | -0.14 |
|  | Learning | -0.05 | -0.19 | -0.19 |  | -0.18 | -0.18 |
|  | Perseverance | -0.54 | -0.22 | -0.35 |  | -0.15 | -0.32 |
|  | **Perspective** | -0.10 | -0.15 | -0.13 |  | -0.15 | -0.12 |
|  | Prudence | -0.29 | -0.22 | -0.26 |  | -0.19 | -0.23 |
|  | **Self-Regulation** | -0.47 | -0.30 | -0.33 |  | -0.24 | -0.22 |
|  | Social int | 0.01 | -0.13 | -0.28 |  | -0.11 | -0.10 |
|  | Spirituality | -0.09 | -0.08 | -0.11 |  | -0.04 | -0.31 |
|  | Teamwork | -0.12 | -0.16 | -0.19 |  | -0.12 | -0.16 |
|  | Zest | -0.17 | -0.17 | -0.31 |  | -0.11 | -0.28 |
| Taken Advantage | Beauty | -0.08 | -0.10 | -0.14 |  | -0.08 | -0.13 |
|  | Bravery | -0.10 | -0.21 | -0.17 |  | -0.19 | -0.15 |
|  | Creativity | -0.02 | -0.10 | -0.10 |  | -0.10 | -0.08 |
|  | Curiosity | -0.14 | -0.11 | -0.15 |  | -0.09 | -0.15 |
|  | Fairness | -0.08 | -0.21 | -0.10 |  | -0.19 | -0.07 |
|  | Forgiveness | -0.03 | -0.19 | -0.19 |  | -0.16 | -0.13 |
|  | Gratitude | -0.20 | -0.10 | -0.14 |  | -0.07 | -0.12 |
|  | Honesty | -0.09 | -0.14 | -0.15 |  | -0.11 | -0.15 |
|  | Hope | -0.22 | -0.15 | -0.20 |  | -0.09 | -0.17 |
|  | Humility | -0.03 | -0.13 | -0.14 |  | -0.12 | -0.13 |
|  | Humor | -0.17 | -0.08 | -0.16 |  | -0.03 | -0.15 |
|  | Judgment | -0.11 | -0.15 | -0.16 |  | -0.12 | -0.14 |
|  | Kindness | 0.00 | -0.18 | -0.13 |  | -0.16 | -0.12 |
|  | **Leadership** | -0.13 | -0.11 | -0.14 |  | -0.08 | -0.12 |
|  | Love | -0.10 | -0.09 | -0.21 |  | -0.02 | -0.18 |
|  | Learning | -0.07 | -0.11 | -0.09 |  | -0.11 | -0.09 |
|  | Perseverance | -0.17 | -0.13 | -0.20 |  | -0.10 | -0.18 |
|  | Perspective | -0.10 | -0.08 | -0.11 |  | -0.08 | -0.11 |
|  | Prudence | -0.12 | -0.17 | -0.11 |  | -0.18 | -0.09 |
|  | **Self-Regulation** | -0.13 | -0.18 | -0.26 |  | -0.12 | -0.22 |
|  | **Social int** | -0.06 | -0.16 | -0.24 |  | -0.16 | 0.01 |
|  | Spirituality | -0.04 | -0.03 | -0.01 |  | 0.00 | -0.26 |
|  | Teamwork | -0.13 | -0.14 | -0.14 |  | -0.11 | -0.11 |
|  | Zest | -0.21 | -0.10 | -0.25 |  | -0.05 | -0.24 |
| Rude | Beauty | -0.22 | -0.13 | -0.30 |  | -0.08 | -0.28 |
|  | Bravery | 0.00 | -0.15 | -0.13 |  | -0.13 | -0.11 |
|  | Creativity | -0.03 | -0.15 | -0.19 |  | -0.14 | -0.17 |
|  | Curiosity | -0.16 | -0.19 | -0.27 |  | -0.15 | -0.26 |
|  | **Fairness** | -0.24 | -0.19 | -0.29 |  | -0.15 | -0.26 |
|  | Forgiveness | -0.28 | -0.22 | -0.27 |  | -0.14 | -0.22 |
|  | Gratitude | -0.29 | -0.17 | -0.28 |  | -0.13 | -0.25 |
|  | Honesty | -0.09 | -0.22 | -0.20 |  | -0.19 | -0.18 |
|  | Hope | -0.24 | -0.20 | -0.26 |  | -0.12 | -0.21 |
|  | **Humility** | -0.16 | -0.19 | -0.20 |  | -0.14 | -0.19 |
|  | Humor | -0.07 | -0.17 | -0.27 |  | -0.12 | -0.23 |
|  | Judgment | -0.02 | -0.19 | -0.19 |  | -0.15 | -0.16 |
|  | Kindness | -0.29 | -0.14 | -0.25 |  | -0.10 | -0.24 |
|  | Leadership | -0.15 | -0.18 | -0.23 |  | -0.11 | -0.20 |
|  | Love | -0.30 | -0.24 | -0.36 |  | -0.11 | -0.31 |
|  | Learning | -0.16 | -0.17 | -0.20 |  | -0.14 | -0.21 |
|  | Perseverance | -0.10 | -0.12 | -0.24 |  | -0.07 | -0.23 |
|  | Perspective | -0.13 | -0.15 | -0.27 |  | -0.13 | -0.27 |
|  | Prudence | -0.11 | -0.16 | -0.14 |  | -0.13 | -0.12 |
|  | Self-Regulation | -0.06 | -0.16 | -0.27 |  | -0.06 | -0.28 |
|  | **Social int** | -0.32 | -0.22 | -0.30 |  | -0.18 | -0.17 |
|  | Spirituality | -0.15 | -0.14 | -0.18 |  | -0.12 | -0.24 |
|  | Teamwork | -0.19 | -0.23 | -0.24 |  | -0.18 | -0.20 |
|  | Zest | -0.20 | -0.18 | -0.23 |  | -0.14 | -0.19 |
| Risk Taking | Beauty | -0.03 | -0.15 | -0.16 |  | -0.13 | -0.13 |
|  | **Bravery** | 0.13 | -0.10 | 0.01 |  | -0.10 | 0.02 |
|  | **Creativity** | 0.13 | -0.12 | -0.03 |  | -0.12 | -0.02 |
|  | **Curiosity** | 0.07 | -0.26 | -0.14 |  | -0.23 | -0.11 |
|  | Fairness | -0.12 | -0.16 | -0.13 |  | -0.14 | -0.09 |
|  | Forgiveness | -0.05 | -0.14 | -0.17 |  | -0.10 | -0.14 |
|  | Gratitude | -0.08 | -0.09 | -0.18 |  | -0.06 | -0.15 |
|  | Honesty | -0.11 | -0.19 | -0.18 |  | -0.16 | -0.15 |
|  | Hope | -0.08 | -0.19 | -0.07 |  | -0.18 | 0.00 |
|  | Humility | -0.08 | -0.16 | -0.09 |  | -0.14 | -0.06 |
|  | Humor | 0.06 | -0.14 | -0.03 |  | -0.13 | 0.01 |
|  | Judgment | -0.10 | -0.12 | -0.16 |  | -0.09 | -0.14 |
|  | Kindness | -0.08 | -0.08 | -0.21 |  | -0.07 | -0.19 |
|  | Leadership | 0.00 | -0.12 | -0.11 |  | -0.08 | -0.08 |
|  | Love | -0.07 | -0.11 | -0.18 |  | -0.05 | -0.15 |
|  | Learning | -0.02 | -0.14 | -0.07 |  | -0.14 | -0.06 |
|  | Perseverance | -0.12 | -0.16 | -0.11 |  | -0.14 | -0.08 |
|  | Perspective | 0.02 | -0.15 | -0.06 |  | -0.15 | -0.05 |
|  | Prudence | -0.27 | -0.15 | -0.25 |  | -0.13 | -0.23 |
|  | **Self-Regulation** | -0.14 | -0.19 | -0.20 |  | -0.16 | -0.09 |
|  | Social int | -0.02 | -0.18 | -0.14 |  | -0.16 | -0.03 |
|  | Spirituality | -0.03 | -0.10 | -0.04 |  | -0.09 | -0.17 |
|  | Teamwork | -0.09 | -0.18 | -0.12 |  | -0.15 | -0.08 |
|  | Zest | 0.09 | -0.08 | -0.11 |  | -0.06 | -0.09 |
| Less Leisure | **Beauty** | -0.17 | -0.05 | -0.09 |  | -0.04 | -0.08 |
|  | Bravery | -0.05 | -0.16 | -0.05 |  | -0.15 | -0.02 |
|  | **Creativity** | -0.05 | -0.04 | -0.06 |  | -0.04 | -0.04 |
|  | Curiosity | -0.20 | -0.08 | -0.14 |  | -0.06 | -0.13 |
|  | Fairness | -0.07 | -0.06 | -0.12 |  | -0.05 | -0.10 |
|  | Forgiveness | -0.09 | -0.13 | -0.10 |  | -0.09 | -0.08 |
|  | Gratitude | -0.21 | -0.05 | -0.07 |  | -0.04 | -0.07 |
|  | Honesty | 0.01 | -0.06 | -0.07 |  | -0.06 | -0.07 |
|  | Hope | -0.21 | -0.11 | -0.16 |  | -0.05 | -0.14 |
|  | Humility | -0.03 | -0.13 | -0.13 |  | -0.11 | -0.11 |
|  | Humor | -0.15 | -0.17 | -0.21 |  | -0.12 | -0.18 |
|  | Judgment | -0.05 | -0.10 | -0.08 |  | -0.09 | -0.06 |
|  | Kindness | -0.11 | -0.03 | -0.09 |  | -0.03 | -0.08 |
|  | Leadership | -0.08 | -0.06 | -0.05 |  | -0.03 | -0.04 |
|  | Love | -0.22 | -0.11 | -0.15 |  | -0.07 | -0.11 |
|  | Learning | -0.04 | -0.12 | -0.08 |  | -0.11 | -0.07 |
|  | **Perseverance** | 0.02 | -0.08 | -0.10 |  | -0.06 | -0.10 |
|  | Perspective | -0.14 | -0.05 | -0.07 |  | -0.06 | -0.07 |
|  | Prudence | -0.03 | -0.14 | 0.01 |  | -0.12 | 0.04 |
|  | **Self-Regulation** | -0.02 | -0.13 | -0.19 |  | -0.08 | -0.13 |
|  | Social int | -0.17 | -0.05 | -0.16 |  | -0.02 | -0.06 |
|  | Spirituality | -0.10 | -0.03 | -0.07 |  | -0.01 | -0.19 |
|  | Teamwork | -0.12 | -0.03 | -0.10 |  | 0.00 | -0.09 |
|  | Zest | -0.20 | -0.11 | -0.19 |  | -0.08 | -0.16 |
| Favorites | Beauty | -0.22 | -0.16 | -0.20 |  | -0.13 | -0.18 |
|  | Bravery | -0.14 | -0.12 | -0.21 |  | -0.10 | -0.21 |
|  | Creativity | -0.06 | -0.15 | -0.16 |  | -0.14 | -0.15 |
|  | Curiosity | -0.18 | -0.16 | -0.19 |  | -0.13 | -0.19 |
|  | **Fairness** | -0.40 | -0.16 | -0.40 |  | -0.10 | -0.39 |
|  | Forgiveness | -0.26 | -0.17 | -0.25 |  | -0.10 | -0.22 |
|  | Gratitude | -0.24 | -0.16 | -0.22 |  | -0.12 | -0.19 |
|  | Honesty | -0.20 | -0.14 | -0.25 |  | -0.11 | -0.24 |
|  | Hope | -0.23 | -0.20 | -0.20 |  | -0.14 | -0.14 |
|  | Humility | -0.12 | -0.17 | -0.20 |  | -0.13 | -0.19 |
|  | Humor | -0.03 | -0.13 | -0.19 |  | -0.08 | -0.17 |
|  | Judgment | -0.17 | -0.15 | -0.15 |  | -0.12 | -0.14 |
|  | Kindness | -0.18 | -0.14 | -0.28 |  | -0.13 | -0.27 |
|  | Leadership | -0.10 | -0.12 | -0.18 |  | -0.06 | -0.17 |
|  | **Love** | -0.14 | -0.15 | -0.21 |  | -0.09 | -0.17 |
|  | Learning | -0.14 | -0.14 | -0.14 |  | -0.13 | -0.14 |
|  | Perseverance | -0.12 | -0.15 | -0.20 |  | -0.11 | -0.17 |
|  | Perspective | -0.07 | -0.17 | -0.11 |  | -0.16 | -0.11 |
|  | Prudence | -0.09 | -0.16 | -0.14 |  | -0.14 | -0.12 |
|  | Self-Regulation | -0.10 | -0.15 | -0.16 |  | -0.10 | -0.19 |
|  | **Social int** | -0.19 | -0.20 | -0.21 |  | -0.17 | -0.10 |
|  | Spirituality | -0.09 | -0.12 | -0.12 |  | -0.11 | -0.15 |
|  | Teamwork | -0.16 | -0.14 | -0.16 |  | -0.09 | -0.13 |
|  | Zest | -0.18 | -0.16 | -0.17 |  | -0.12 | -0.14 |
| No Promos | Beauty | -0.13 | -0.13 | -0.09 |  | -0.12 | -0.07 |
|  | **Bravery** | -0.23 | -0.17 | -0.25 |  | -0.16 | -0.23 |
|  | Creativity | -0.16 | -0.05 | -0.20 |  | -0.03 | -0.19 |
|  | Curiosity | -0.19 | -0.11 | -0.17 |  | -0.09 | -0.16 |
|  | Fairness | -0.20 | -0.04 | -0.13 |  | -0.02 | -0.13 |
|  | Forgiveness | -0.13 | -0.12 | -0.17 |  | -0.07 | -0.15 |
|  | Gratitude | -0.25 | -0.04 | -0.13 |  | -0.03 | -0.12 |
|  | Honesty | -0.15 | -0.05 | -0.13 |  | -0.04 | -0.14 |
|  | Hope | -0.33 | -0.18 | -0.28 |  | -0.09 | -0.25 |
|  | **Humility** | -0.02 | -0.13 | -0.14 |  | -0.12 | -0.13 |
|  | Humor | -0.15 | -0.06 | -0.15 |  | -0.03 | -0.14 |
|  | Judgment | -0.12 | -0.08 | -0.12 |  | -0.06 | -0.11 |
|  | Kindness | -0.20 | -0.07 | -0.10 |  | -0.08 | -0.10 |
|  | **Leadership** | -0.33 | -0.17 | -0.34 |  | -0.11 | -0.32 |
|  | Love | -0.30 | -0.16 | -0.25 |  | -0.11 | -0.20 |
|  | Learning | -0.16 | -0.14 | -0.12 |  | -0.14 | -0.12 |
|  | Perseverance | -0.26 | -0.13 | -0.25 |  | -0.08 | -0.24 |
|  | Perspective | -0.21 | -0.08 | -0.18 |  | -0.08 | -0.17 |
|  | Prudence | -0.12 | -0.20 | -0.14 |  | -0.20 | -0.13 |
|  | Self-Regulation | -0.20 | -0.22 | -0.22 |  | -0.17 | -0.19 |
|  | Social int | -0.23 | -0.12 | -0.23 |  | -0.09 | -0.13 |
|  | Spirituality | -0.16 | -0.06 | -0.14 |  | -0.03 | -0.22 |
|  | Teamwork | -0.27 | -0.15 | -0.27 |  | -0.10 | -0.25 |
|  | Zest | -0.30 | -0.12 | -0.19 |  | -0.09 | -0.17 |
| Not Taken Seriously | Beauty | -0.14 | -0.09 | -0.22 |  | -0.06 | -0.21 |
|  | Bravery | -0.16 | -0.21 | -0.18 |  | -0.20 | -0.16 |
|  | Creativity | -0.10 | -0.09 | -0.24 |  | -0.07 | -0.23 |
|  | Curiosity | -0.17 | -0.12 | -0.25 |  | -0.08 | -0.25 |
|  | Fairness | -0.11 | -0.10 | -0.20 |  | -0.08 | -0.19 |
|  | Forgiveness | -0.09 | -0.09 | -0.25 |  | -0.03 | -0.23 |
|  | Gratitude | -0.23 | -0.08 | -0.23 |  | -0.04 | -0.22 |
|  | Honesty | -0.17 | -0.16 | -0.25 |  | -0.15 | -0.24 |
|  | Hope | -0.25 | -0.20 | -0.33 |  | -0.10 | -0.30 |
|  | Humility | 0.01 | -0.19 | -0.21 |  | -0.17 | -0.20 |
|  | **Humor** | -0.08 | -0.14 | -0.17 |  | -0.11 | -0.13 |
|  | Judgment | -0.16 | -0.09 | -0.23 |  | -0.03 | -0.23 |
|  | Kindness | -0.15 | -0.15 | -0.21 |  | -0.13 | -0.21 |
|  | Leadership | -0.32 | -0.26 | -0.30 |  | -0.20 | -0.26 |
|  | Love | -0.23 | -0.13 | -0.30 |  | -0.06 | -0.26 |
|  | Learning | -0.17 | -0.15 | -0.17 |  | -0.15 | -0.17 |
|  | Perseverance | -0.17 | -0.07 | -0.29 |  | -0.02 | -0.29 |
|  | Perspective | -0.34 | -0.09 | -0.24 |  | -0.08 | -0.24 |
|  | Prudence | -0.21 | -0.16 | -0.17 |  | -0.16 | -0.16 |
|  | Self-Regulation | -0.15 | -0.20 | -0.30 |  | -0.14 | -0.26 |
|  | Social int | -0.18 | -0.20 | -0.29 |  | -0.18 | -0.14 |
|  | Spirituality | -0.13 | -0.11 | -0.16 |  | -0.09 | -0.29 |
|  | Teamwork | -0.20 | -0.17 | -0.18 |  | -0.12 | -0.16 |
|  | Zest | -0.20 | -0.11 | -0.32 |  | -0.05 | -0.30 |
| Few Interests | Beauty | -0.38 | -0.05 | -0.20 |  | -0.02 | -0.19 |
|  | Bravery | -0.13 | -0.16 | -0.20 |  | -0.14 | -0.17 |
|  | Creativity | -0.33 | -0.06 | -0.25 |  | -0.05 | -0.23 |
|  | Curiosity | -0.61 | 0.00 | -0.33 |  | 0.05 | -0.34 |
|  | Fairness | -0.21 | -0.09 | -0.20 |  | -0.06 | -0.18 |
|  | Forgiveness | -0.20 | -0.11 | -0.21 |  | -0.06 | -0.19 |
|  | Gratitude | -0.28 | -0.02 | -0.17 |  | 0.00 | -0.18 |
|  | Honesty | -0.05 | -0.09 | -0.16 |  | -0.08 | -0.15 |
|  | Hope | -0.29 | -0.15 | -0.27 |  | -0.07 | -0.24 |
|  | Humility | -0.07 | -0.10 | -0.12 |  | -0.08 | -0.12 |
|  | Humor | -0.13 | -0.15 | -0.17 |  | -0.12 | -0.12 |
|  | Judgment | -0.10 | -0.08 | -0.11 |  | -0.06 | -0.10 |
|  | Kindness | -0.21 | -0.04 | -0.12 |  | -0.05 | -0.11 |
|  | Leadership | -0.16 | -0.08 | -0.20 |  | -0.04 | -0.17 |
|  | Love | -0.27 | -0.14 | -0.25 |  | -0.08 | -0.21 |
|  | Learning | -0.36 | -0.05 | -0.27 |  | -0.04 | -0.27 |
|  | Perseverance | -0.08 | -0.04 | -0.19 |  | -0.01 | -0.19 |
|  | Perspective | -0.23 | -0.01 | -0.18 |  | 0.00 | -0.17 |
|  | Prudence | -0.09 | -0.08 | -0.11 |  | -0.07 | -0.11 |
|  | **Self-Regulation** | -0.08 | -0.09 | -0.22 |  | -0.04 | -0.22 |
|  | Social int | -0.24 | -0.11 | -0.24 |  | -0.09 | -0.12 |
|  | Spirituality | -0.16 | -0.05 | -0.13 |  | -0.03 | -0.21 |
|  | Teamwork | -0.13 | -0.07 | -0.11 |  | -0.04 | -0.09 |
|  | Zest | -0.34 | -0.11 | -0.31 |  | -0.05 | -0.28 |
| I Brag | Beauty | -0.13 | -0.09 | -0.18 |  | -0.06 | -0.17 |
|  | Bravery | -0.06 | -0.06 | -0.09 |  | -0.05 | -0.09 |
|  | Creativity | -0.03 | -0.07 | -0.04 |  | -0.07 | -0.03 |
|  | Curiosity | -0.08 | -0.06 | -0.08 |  | -0.05 | -0.08 |
|  | Fairness | -0.26 | -0.08 | -0.22 |  | -0.05 | -0.21 |
|  | Forgiveness | -0.18 | -0.06 | -0.14 |  | -0.03 | -0.12 |
|  | Gratitude | -0.13 | -0.04 | -0.14 |  | -0.01 | -0.12 |
|  | Honesty | -0.22 | -0.12 | -0.20 |  | -0.10 | -0.17 |
|  | Hope | -0.14 | -0.08 | -0.08 |  | -0.06 | -0.06 |
|  | **Humility** | -0.53 | -0.03 | -0.22 |  | 0.02 | -0.22 |
|  | Humor | -0.02 | -0.06 | -0.09 |  | -0.04 | -0.07 |
|  | Judgment | -0.23 | -0.10 | -0.16 |  | -0.06 | -0.16 |
|  | Kindness | -0.12 | 0.00 | -0.15 |  | 0.01 | -0.15 |
|  | Leadership | -0.08 | -0.01 | -0.04 |  | 0.03 | -0.04 |
|  | Love | -0.09 | -0.02 | -0.08 |  | 0.00 | -0.07 |
|  | Learning | -0.11 | -0.08 | -0.09 |  | -0.08 | -0.10 |
|  | Perseverance | -0.17 | -0.07 | -0.16 |  | -0.05 | -0.14 |
|  | Perspective | -0.11 | -0.08 | -0.11 |  | -0.07 | -0.11 |
|  | Prudence | -0.24 | -0.08 | -0.13 |  | -0.08 | -0.13 |
|  | Self-Regulation | -0.19 | -0.06 | -0.14 |  | -0.02 | -0.09 |
|  | **Social int** | -0.13 | -0.06 | -0.10 |  | -0.05 | -0.04 |
|  | Spirituality | -0.06 | -0.10 | -0.04 |  | -0.10 | -0.13 |
|  | Teamwork | -0.12 | -0.07 | -0.12 |  | -0.03 | -0.10 |
|  | Zest | -0.01 | -0.10 | -0.08 |  | -0.09 | -0.06 |
| Accomplishments | Beauty | -0.14 | -0.06 | -0.14 |  | -0.04 | -0.13 |
|  | Bravery | -0.17 | -0.13 | -0.12 |  | -0.10 | -0.11 |
|  | Creativity | -0.16 | -0.03 | -0.13 |  | -0.01 | -0.13 |
|  | Curiosity | -0.16 | -0.03 | -0.08 |  | -0.01 | -0.08 |
|  | Fairness | -0.01 | -0.01 | -0.05 |  | 0.00 | -0.04 |
|  | Forgiveness | -0.04 | -0.04 | -0.11 |  | 0.00 | -0.10 |
|  | Gratitude | -0.16 | -0.09 | -0.05 |  | -0.08 | -0.03 |
|  | Honesty | -0.06 | -0.09 | -0.08 |  | -0.08 | -0.07 |
|  | Hope | -0.21 | -0.10 | -0.18 |  | -0.02 | -0.17 |
|  | **Humility** | 0.27 | -0.15 | -0.04 |  | -0.13 | -0.03 |
|  | Humor | -0.16 | -0.10 | -0.15 |  | -0.06 | -0.13 |
|  | Judgment | -0.01 | -0.04 | -0.01 |  | -0.04 | -0.01 |
|  | Kindness | -0.17 | -0.09 | -0.02 |  | -0.06 | -0.02 |
|  | Leadership | -0.17 | -0.15 | -0.21 |  | -0.08 | -0.20 |
|  | Love | -0.27 | -0.10 | -0.20 |  | -0.02 | -0.18 |
|  | Learning | -0.06 | -0.07 | -0.07 |  | -0.06 | -0.06 |
|  | Perseverance | 0.00 | -0.08 | -0.14 |  | -0.05 | -0.13 |
|  | Perspective | -0.15 | -0.08 | -0.11 |  | -0.06 | -0.12 |
|  | Prudence | 0.07 | -0.07 | 0.06 |  | -0.06 | 0.06 |
|  | **Self-Regulation** | 0.02 | -0.09 | -0.08 |  | -0.04 | -0.13 |
|  | Social int | -0.20 | -0.14 | -0.14 |  | -0.11 | -0.13 |
|  | Spirituality | -0.11 | -0.05 | -0.13 |  | -0.04 | -0.07 |
|  | Teamwork | -0.07 | -0.10 | -0.09 |  | -0.06 | -0.09 |
|  | Zest | -0.22 | -0.10 | -0.16 |  | -0.08 | -0.14 |
| Dull | Beauty | -0.20 | -0.02 | -0.26 |  | 0.02 | -0.26 |
|  | Bravery | -0.27 | -0.15 | -0.21 |  | -0.13 | -0.19 |
|  | Creativity | -0.27 | -0.03 | -0.32 |  | 0.00 | -0.32 |
|  | Curiosity | -0.32 | -0.01 | -0.22 |  | 0.03 | -0.23 |
|  | Fairness | -0.10 | -0.05 | -0.19 |  | -0.02 | -0.18 |
|  | Forgiveness | -0.08 | -0.10 | -0.21 |  | -0.03 | -0.19 |
|  | Gratitude | -0.25 | -0.10 | -0.23 |  | -0.05 | -0.23 |
|  | Honesty | -0.11 | -0.07 | -0.14 |  | -0.05 | -0.14 |
|  | Hope | -0.25 | -0.11 | -0.33 |  | 0.00 | -0.33 |
|  | Humility | 0.09 | -0.17 | -0.14 |  | -0.14 | -0.13 |
|  | Humor | -0.38 | -0.08 | -0.41 |  | 0.01 | -0.40 |
|  | Judgment | -0.04 | -0.08 | -0.15 |  | -0.04 | -0.15 |
|  | Kindness | -0.27 | -0.07 | -0.14 |  | -0.06 | -0.14 |
|  | Leadership | -0.37 | -0.18 | -0.35 |  | -0.09 | -0.33 |
|  | Love | -0.38 | -0.13 | -0.35 |  | 0.00 | -0.33 |
|  | Learning | -0.15 | -0.07 | -0.19 |  | -0.05 | -0.20 |
|  | Perseverance | -0.05 | -0.06 | -0.23 |  | -0.01 | -0.23 |
|  | Perspective | -0.34 | -0.03 | -0.27 |  | -0.01 | -0.27 |
|  | Prudence | 0.03 | -0.10 | 0.01 |  | -0.10 | 0.02 |
|  | Self-Regulation | -0.04 | -0.13 | -0.26 |  | -0.03 | -0.29 |
|  | Social int | -0.43 | -0.18 | -0.30 |  | -0.14 | -0.20 |
|  | Spirituality | -0.18 | -0.09 | -0.21 |  | -0.05 | -0.25 |
|  | Teamwork | -0.18 | -0.02 | -0.21 |  | 0.05 | -0.22 |
|  | **Zest** | -0.40 | -0.11 | -0.28 |  | -0.05 | -0.27 |
| Grudges | Beauty | -0.21 | -0.10 | -0.24 |  | -0.07 | -0.23 |
|  | Bravery | -0.08 | -0.10 | -0.19 |  | -0.07 | -0.19 |
|  | Creativity | -0.16 | -0.10 | -0.15 |  | -0.08 | -0.15 |
|  | Curiosity | -0.22 | -0.10 | -0.20 |  | -0.06 | -0.20 |
|  | **Fairness** | -0.33 | -0.14 | -0.31 |  | -0.10 | -0.30 |
|  | **Forgiveness** | -0.61 | -0.20 | -0.39 |  | -0.08 | -0.35 |
|  | Gratitude | -0.26 | -0.15 | -0.22 |  | -0.11 | -0.19 |
|  | Honesty | -0.08 | -0.12 | -0.25 |  | -0.09 | -0.24 |
|  | Hope | -0.35 | -0.11 | -0.32 |  | 0.00 | -0.31 |
|  | Humility | -0.20 | -0.16 | -0.17 |  | -0.13 | -0.15 |
|  | Humor | -0.09 | -0.13 | -0.23 |  | -0.09 | -0.21 |
|  | **Judgment** | -0.14 | -0.18 | -0.18 |  | -0.15 | -0.15 |
|  | **Kindness** | -0.15 | -0.03 | -0.17 |  | -0.01 | -0.18 |
|  | Leadership | -0.10 | -0.05 | -0.12 |  | 0.02 | -0.12 |
|  | Love | -0.19 | -0.10 | -0.17 |  | -0.04 | -0.15 |
|  | Learning | -0.12 | -0.10 | -0.11 |  | -0.09 | -0.11 |
|  | Perseverance | -0.14 | -0.11 | -0.20 |  | -0.07 | -0.19 |
|  | Perspective | -0.11 | -0.06 | -0.13 |  | -0.04 | -0.14 |
|  | Prudence | -0.14 | -0.16 | -0.09 |  | -0.12 | -0.07 |
|  | Self-Regulation | -0.14 | -0.17 | -0.23 |  | -0.09 | -0.26 |
|  | Social int | -0.18 | -0.18 | -0.27 |  | -0.14 | -0.13 |
|  | Spirituality | -0.15 | -0.05 | -0.14 |  | -0.02 | -0.23 |
|  | Teamwork | -0.18 | -0.09 | -0.17 |  | -0.04 | -0.16 |
|  | Zest | -0.24 | -0.10 | -0.21 |  | -0.05 | -0.19 |
| Laugh Jokes | Beauty | -0.24 | -0.16 | -0.18 |  | -0.14 | -0.16 |
|  | Bravery | -0.15 | -0.12 | -0.11 |  | -0.11 | -0.11 |
|  | Creativity | -0.06 | -0.15 | -0.20 |  | -0.14 | -0.20 |
|  | Curiosity | -0.22 | -0.09 | -0.17 |  | -0.06 | -0.17 |
|  | Fairness | -0.13 | -0.17 | -0.16 |  | -0.15 | -0.13 |
|  | Forgiveness | -0.12 | -0.15 | -0.16 |  | -0.12 | -0.11 |
|  | Gratitude | -0.23 | -0.12 | -0.22 |  | -0.08 | -0.19 |
|  | Honesty | -0.08 | -0.18 | -0.13 |  | -0.15 | -0.09 |
|  | Hope | -0.23 | -0.14 | -0.18 |  | -0.09 | -0.14 |
|  | Humility | -0.02 | -0.20 | -0.13 |  | -0.18 | -0.11 |
|  | **Humor** | -0.32 | -0.17 | -0.34 |  | -0.10 | -0.32 |
|  | Judgment | -0.03 | -0.15 | -0.13 |  | -0.12 | -0.11 |
|  | Kindness | -0.23 | -0.10 | -0.11 |  | -0.09 | -0.10 |
|  | Leadership | -0.21 | -0.20 | -0.19 |  | -0.15 | -0.16 |
|  | Love | -0.22 | -0.23 | -0.24 |  | -0.16 | -0.17 |
|  | Learning | -0.13 | -0.11 | -0.13 |  | -0.10 | -0.13 |
|  | Perseverance | 0.01 | -0.12 | -0.09 |  | -0.10 | -0.07 |
|  | Perspective | -0.16 | -0.14 | -0.16 |  | -0.14 | -0.16 |
|  | Prudence | 0.06 | -0.12 | -0.08 |  | -0.12 | -0.07 |
|  | **Self-Regulation** | 0.12 | -0.14 | -0.13 |  | -0.08 | -0.14 |
|  | **Social int** | -0.33 | -0.18 | -0.16 |  | -0.15 | -0.15 |
|  | Spirituality | -0.12 | -0.14 | -0.16 |  | -0.12 | -0.11 |
|  | Teamwork | -0.15 | -0.08 | -0.20 |  | -0.02 | -0.19 |
|  | Zest | -0.20 | -0.11 | -0.15 |  | -0.09 | -0.12 |
| Control People | Beauty | -0.12 | -0.22 | -0.21 |  | -0.20 | -0.17 |
|  | Bravery | 0.02 | -0.13 | -0.06 |  | -0.13 | -0.04 |
|  | Creativity | 0.00 | -0.23 | -0.11 |  | -0.23 | -0.08 |
|  | Curiosity | -0.07 | -0.15 | -0.23 |  | -0.13 | -0.21 |
|  | **Fairness** | -0.20 | -0.21 | -0.29 |  | -0.18 | -0.26 |
|  | Forgiveness | -0.16 | -0.24 | -0.25 |  | -0.17 | -0.19 |
|  | Gratitude | -0.19 | -0.18 | -0.21 |  | -0.15 | -0.18 |
|  | Honesty | -0.12 | -0.18 | -0.25 |  | -0.15 | -0.23 |
|  | Hope | -0.20 | -0.19 | -0.18 |  | -0.14 | -0.12 |
|  | Humility | -0.24 | -0.21 | -0.25 |  | -0.17 | -0.24 |
|  | Humor | -0.13 | -0.15 | -0.25 |  | -0.11 | -0.21 |
|  | Judgment | -0.11 | -0.29 | -0.24 |  | -0.25 | -0.20 |
|  | Kindness | -0.16 | -0.09 | -0.30 |  | -0.05 | -0.30 |
|  | **Leadership** | -0.05 | -0.11 | -0.05 |  | -0.07 | -0.03 |
|  | Love | -0.13 | -0.23 | -0.23 |  | -0.16 | -0.16 |
|  | Learning | -0.08 | -0.13 | -0.15 |  | -0.12 | -0.14 |
|  | Perseverance | -0.13 | -0.21 | -0.09 |  | -0.19 | -0.05 |
|  | Perspective | 0.00 | -0.19 | -0.18 |  | -0.18 | -0.16 |
|  | Prudence | -0.10 | -0.19 | -0.11 |  | -0.16 | -0.09 |
|  | **Self-Regulation** | -0.07 | -0.20 | -0.26 |  | -0.11 | -0.30 |
|  | **Social int** | -0.17 | -0.19 | -0.34 |  | -0.16 | -0.08 |
|  | Spirituality | -0.05 | -0.15 | -0.11 |  | -0.13 | -0.24 |
|  | **Teamwork** | -0.23 | -0.17 | -0.18 |  | -0.13 | -0.14 |
|  | Zest | -0.15 | -0.15 | -0.16 |  | -0.13 | -0.12 |
| Aggressive | Beauty | -0.17 | -0.13 | -0.26 |  | -0.09 | -0.23 |
|  | Bravery | 0.08 | -0.15 | -0.06 |  | -0.15 | -0.03 |
|  | Creativity | 0.03 | -0.20 | -0.11 |  | -0.19 | -0.08 |
|  | Curiosity | -0.10 | -0.17 | -0.24 |  | -0.14 | -0.23 |
|  | Fairness | -0.27 | -0.23 | -0.25 |  | -0.20 | -0.20 |
|  | Forgiveness | -0.33 | -0.22 | -0.23 |  | -0.16 | -0.17 |
|  | Gratitude | -0.25 | -0.18 | -0.23 |  | -0.14 | -0.19 |
|  | Honesty | -0.12 | -0.27 | -0.19 |  | -0.24 | -0.16 |
|  | Hope | -0.24 | -0.25 | -0.22 |  | -0.20 | -0.15 |
|  | Humility | -0.22 | -0.20 | -0.16 |  | -0.16 | -0.14 |
|  | Humor | -0.12 | -0.19 | -0.26 |  | -0.14 | -0.21 |
|  | Judgment | -0.06 | -0.23 | -0.14 |  | -0.21 | -0.11 |
|  | **Kindness** | -0.28 | -0.09 | -0.26 |  | -0.07 | -0.26 |
|  | **Leadership** | -0.06 | -0.15 | -0.07 |  | -0.12 | -0.03 |
|  | Love | -0.19 | -0.22 | -0.22 |  | -0.14 | -0.17 |
|  | Learning | -0.15 | -0.12 | -0.18 |  | -0.10 | -0.17 |
|  | Perseverance | -0.09 | -0.17 | -0.16 |  | -0.13 | -0.14 |
|  | Perspective | -0.07 | -0.22 | -0.16 |  | -0.21 | -0.13 |
|  | Prudence | -0.16 | -0.20 | -0.13 |  | -0.19 | -0.09 |
|  | Self-Regulation | -0.04 | -0.15 | -0.27 |  | -0.07 | -0.20 |
|  | Social int | -0.22 | -0.19 | -0.23 |  | -0.15 | -0.10 |
|  | Spirituality | -0.12 | -0.20 | -0.11 |  | -0.18 | -0.24 |
|  | Teamwork | -0.18 | -0.13 | -0.23 |  | -0.07 | -0.21 |
|  | Zest | -0.10 | -0.14 | -0.16 |  | -0.11 | -0.13 |
| Make Laugh | Beauty | -0.14 | 0.03 | -0.09 |  | 0.04 | -0.11 |
|  | Bravery | -0.18 | -0.04 | -0.06 |  | -0.04 | -0.06 |
|  | **Creativity** | -0.22 | -0.01 | -0.16 |  | 0.01 | -0.15 |
|  | Curiosity | -0.20 | 0.05 | -0.07 |  | 0.05 | -0.08 |
|  | Fairness | -0.04 | 0.02 | -0.06 |  | 0.03 | -0.07 |
|  | Forgiveness | -0.02 | 0.00 | -0.07 |  | 0.04 | -0.08 |
|  | Gratitude | -0.11 | 0.01 | -0.10 |  | 0.04 | -0.12 |
|  | Honesty | -0.01 | 0.03 | 0.00 |  | 0.01 | 0.00 |
|  | Hope | -0.12 | 0.00 | -0.13 |  | 0.05 | -0.14 |
|  | **Humility** | 0.13 | -0.04 | -0.05 |  | -0.02 | -0.05 |
|  | **Humor** | -0.67 | 0.00 | -0.38 |  | 0.10 | -0.40 |
|  | Judgment | -0.08 | 0.01 | -0.04 |  | 0.02 | -0.06 |
|  | Kindness | -0.19 | 0.01 | 0.01 |  | 0.00 | 0.02 |
|  | Leadership | -0.25 | -0.10 | -0.16 |  | -0.06 | -0.14 |
|  | Love | -0.20 | 0.01 | -0.10 |  | 0.04 | -0.10 |
|  | Learning | -0.09 | 0.04 | -0.06 |  | 0.04 | -0.06 |
|  | Perseverance | 0.09 | 0.03 | -0.04 |  | 0.04 | -0.04 |
|  | Perspective | -0.25 | 0.03 | -0.11 |  | 0.04 | -0.10 |
|  | Prudence | 0.06 | 0.00 | 0.05 |  | 0.00 | 0.04 |
|  | Self-Regulation | 0.14 | 0.02 | -0.08 |  | 0.05 | -0.10 |
|  | Social int | -0.36 | -0.10 | -0.09 |  | -0.08 | -0.03 |
|  | Spirituality | -0.01 | 0.06 | -0.06 |  | 0.09 | -0.10 |
|  | Teamwork | -0.07 | 0.10 | -0.07 |  | 0.14 | -0.09 |
|  | Zest | -0.20 | -0.03 | -0.10 |  | 0.00 | -0.09 |
| *M* all |  | -0.11 | -0.09 | -0.12 |  | -0.06 | -0.11 |
| *M* expected |  | -0.12 | -0.10 | -0.13 |  | -0.07 | -0.11 |

*Note.* Bolded strengths indicate outcome-strength combinations that were rated as expected. *Pr* = partial correlation. “*M* all” is the mean strength-outcome correlation based on all 792 combinations. “*M* expected” is based on the 99 expected combinations.
